# Supplementary material for: GATA3 acts upstream of FOXA1 in mediating ESR1 binding by shaping enhancer accessibility
Source: HighWire-hosted journal article supplement (doi:10.1101/gr.139469.112), 2012-11-21
Supplement: Supplemental_Experimental_Procedures_.docx [file Supplemental_Experimental_Procedures_.docx]

**Supplemental Experimental Procedures**

**Antibodies for ChIP experiments and western blots**

For the ChIP experiments we used anti-ER (sc-543), anti-GATA3 (sc-248), anti-p300 (sc-585) from Santa Cruz Biotechnologies. Antibodies for H3K4me1 (ab8895) and H3K27Ac (ab4729) are from Abcam. For the western blots we used anti-ER(6F11/2, Novocastra) and total H3 (ab1791, Abcam).

**ChIP-Seq library preparation, Illumina Sequencing, and enrichment analysis**

For every ChIP-Seq library the starting material was four 15cm culture dishes. ChIP-Seq of histone marks were performed from three 15cm plates. For the ChIP-Seq libraries in siGATA3 conditions a pool of the siRNAs described at the previous section was used at a 50nM final concentration. Sequences generated by the Illumina GAIIx genome analyzer were aligned against NCBI Build 36.3 of the human genome using BWA version 0.5.5 (Li and Durbin, 2010). For transcription factor ChiP-Seq libraries we generated 36bp reads and 50bp for the histone marks libraries. Reads were filtered by removing those with a BWA alignment quality score less than 15. Enriched regions of the genome were identified by comparing the ChIP samples to input samples using the MACS peak caller (Zhang et al., 2008) version 1.3.7.1. Raw ChIP-Seq data were visualized using the USCS genome browser.

Heatmaps were generated as described in Heinzman et al., 2007. The input file included the binding events centers, sorted on binding signal (reads in peak) from stronger to weaker. Reads were normalized over input and 10 million reads.

**Differential binding analysis (DBA)**

Significantly differentially bound sites were identified using the Bioconductor package DiffBind (Stark et al, 2011) in a manner described in Ross-Innes et al., 2012. For GATA3 (Fig. 1B and Supplemental Fig. S1A), peaks that were identified in at least two of the ten samples (five replicates of each of Vehicle and E2) were included in the DBA. For baseline ER binding sites (Fig. 1B), all peaks identified in at least two of the three replicates of the ER ChIP for the siControl condition we considered. For ER binding sites in the siGATA3 condition (Fig. 1C), peaks that were identified in at least three of the six samples (three replicates each of siControl and siGATA3) were included in the DBA. In all cases, an FDR cutoff of 0.10 was used to determine significantly differentially bound sites.

**Microarray expression experiment**

Gene expression analysis was carried out on Illumina Human HT12 version 3 arrays. All data analysis was carried out on R using Bioconductor packages (Gentleman et al., 2004). Raw intensity data from the array scanner was processed using the BASH (Cairns et al., 2008) and HULK algorithms as implemented in the *beadarray* package (Dunning et al., 2007). Log2 transformation and quantile normalisation of the data was performed. Differential expression analysis was carried out using the *limma* package (Smyth, G.K., 2005). Differentially expressed genes (DEGs) were selected using a p-value cut-off of <0.01 after application of FDR correction for multiple testing applied globally to correct for multiple contrasts.

**Integration of ChIP-Seq datasets with expression data**

We used the USCS March2006.hg18 version of the human version, to generate a bed file of 50kb window centered on TSSs, which we subsequently overlapped with the ChIP-Seq binding events. 'Peaks to genes' lists enrichment was assessed in a threshold-free manner using R-GSEA, an implementation of Gene Set Enrichment Analysis (GSEA) (Subramanian et al., 2005) in R. Enrichment of these 'peaks to genes' lists with the DEG lists was further assessed independently using the hypergeometric test for over-representation. In Supplemental Fig. S3C we used a significance p-value <0.01 for E2-Veh siControl genes from our microarray.

**Transcription factor motif analysis**

De novo motif discovery was done using Weeder (Pavesi et al., 2004). The motif analysis for identifying enrichment of known motifs (Supplemental Fig.S1C and Fig. S2C) was performed using the program CLOVER (Frith et al., 2004), which compares and calculates probability enrichments to sets of DNA sequences in the JASPAR CORE vertebrates Human collection of transcription factor-binding patterns (Sandelin et al., 2004).

**Chromosome-Conformational-Capture (3C) Assays**

Briefly, cells from a 15cm2 dish were fixed for 10 min with 1% formaldehyde, scraped, pelleted and washed 2 x with PBS. Cells were lysed in 0.5% SDS-Lysis buffer for 20 min, assisted by syringing using a 26G needle in order to efficiently remove the cytoplasm and isolate single nuclei. Nuclei were pelleted and subsequently digested with BamH1 (2400 units) overnight. Two thirds of the digest was ligated with T4 DNA Ligase (3200 units) at 16o C for 6 hours and further digested with EcoR1 (1000 units) for 2 hours. The remaining one third was used as a minus Ligase Control. Subsequent proteinase K treatment was performed overnight at 65oC. Two rounds of phenol-chloroform extraction were performed, followed by one round of chloroform extraction. DNA was ethanol precipitated and eluted in a final volume of 120ul of H20. All enzymes are from New England Biolabs (NEB).

Each interaction was normalized over the copy number, minus ligase value and lastly over the negative control interaction

Primer sequences:

1: TTCAAAAGGGAACAGATAGCTCAGA, 2: CCTGTGTGAGTACTGCCCTGACT,

3: TCAAGCCTTTATCACCAAGTGATTC, 4: AGCAGGAGCTGTACTATCGGTAACA,

5: TTGTGAGCCTTAATCCTTTTTCCTC, 6: TTCTCTTGTCTGCTTTGCTATCAGG,

7: CTCTGTCTATCAGCAAATCCTTCCA, 8: AGAGAGGAGGCTGTGGAAGTTAGTG,

9: CTTCCCCAGAGCAATAAAGTGTGAT, 10: GGGGAGACCACATAAGCAATAAGAT,

11: GCGAGGAGAGTGAAGACTGTAAAA.

Copy number RP-11 Forward: ACCCCCTCTCCATAACTATGAGAA,

Reverse: GCTGTCTACGTCTACTCAATCCTTACTG

**Supplemental References**

Cairns, J.M., Dunning, M.J., Ritchie, M.E., Russell, R., and Lynch, A.G. (2008). BASH: a tool for managing BeadArray spatial artefacts. Bioinformatics *24*, 2921-2922.

Dunning, M.J., Smith, M.L., Ritchie, M.E., and Tavare, S. (2007). beadarray: R classes and methods for Illumina bead-based data. Bioinformatics *23*, 2183-2184.

Frith, M.C., Hansen, U., Spouge, J.L., and Weng, Z. (2004). Finding functional sequence elements by multiple local alignment. Nucleic Acids Res *32*, 189-200.

Gentleman, R.C., Carey, V.J., Bates, D.M., Bolstad, B., Dettling, M., Dudoit, S., Ellis, B., Gautier, L., Ge, Y., Gentry, J.*, et al.* (2004). Bioconductor: open software development for computational biology and bioinformatics. Genome Biol *5*, R80.

Li, H., and Durbin, R. (2010). Fast and accurate long-read alignment with Burrows-Wheeler transform. Bioinformatics *26*, 589-595.

Pavesi, G., Mereghetti, P., Mauri, G., and Pesole, G. (2004). Weeder Web: discovery of transcription factor binding sites in a set of sequences from co-regulated genes. Nucleic Acids Res *32*, W199-203.

Robinson, M.D., and Oshlack, A. (2010). A scaling normalization method for differential expression analysis of RNA-seq data. Genome Biol *11*, R25.

Smyth, G.K. (2005). Limma: linear models for microarray data in R. In Bioinformatics and Computational Biology Solutions using R and Bioconductor, R.Gentleman, V.Carey, W.Huber, R.Irizarry, S.Dudoit, ed. (New York: Springer), pp. 397–420.

Subramanian, A., Tamayo, P., Mootha, V.K., Mukherjee, S., Ebert, B.L., Gillette, M.A., Paulovich, A., Pomeroy, S.L., Golub, T.R., Lander, E.S.*, et al.* (2005). Gene set enrichment analysis: a knowledge-based approach for interpreting genome-wide expression profiles. Proc Natl Acad Sci U S A *102*, 15545-15550.

Zhang, Y., Liu, T., Meyer, C.A., Eeckhoute, J., Johnson, D.S., Bernstein, B.E., Nusbaum, C., Myers, R.M., Brown, M., Li, W.*, et al.* (2008). Model-based analysis of ChIP-Seq (MACS). Genome Biol *9*, R137.
